# Supplementary material for: Synthesis and morphology transformation of single-crystal graphene domains based on activated carbon dioxide by chemical vapor deposition
Source: Royal Society of Chemistry journal article supplement (doi:10.1039/c3tc30124a), 2013-01-01
Supplement: c3tc30124a.pdf [file c3tc30124a.pdf]

## *Supporting information*

# Synthesis and morphology transformation of single-crystal graphene domains based on activated carbon dioxide by chemical vapor deposition

Birong Luo<sup>a,b</sup>, Hongtao Liu<sup>a</sup>, Lili Jiang<sup>a</sup>, Lang Jiang<sup>a</sup>, Dechao Geng<sup>a</sup>, Bin Wu<sup>a</sup>,  
Wenping Hu<sup>a</sup>, Yunqi Liu<sup>a</sup>, and Gui Yu<sup>\*a</sup>

<sup>a</sup> National Laboratory for Molecular Sciences, Institute of Chemistry, Chinese Academy of  
Sciences, Beijing, P. R. China

<sup>b</sup> University of Chinese Academy of Sciences, Beijing 100049, P. R. China

\*Corresponding Author

Fax: 86-10-62559373;

Tel: 86-10-62613253;

E-mail: yugui@iccas.ac.cn

## 1 Main physical and chemical properties of catalyst for CO<sub>2</sub>:

**Table S1.** The main physical and chemical properties of the Ni/Al<sub>2</sub>O<sub>3</sub> catalyst for CO<sub>2</sub>.

| item               | content                                                                                           |
|--------------------|---------------------------------------------------------------------------------------------------|
| Chemical component | NiO: 18±1.0%; TiO <sub>2</sub> : 6-8%; Al <sub>2</sub> O <sub>3</sub> : 75±2%                     |
| Specification      | Φ4.5~5.5 mm                                                                                       |
| Bulk density       | 0.9-1.0 g/cm <sup>3</sup>                                                                         |
| Chemical property  | CO <sub>2</sub> +H <sub>2</sub> $\xrightarrow{\text{catalyst}}$ CH <sub>4</sub> +H <sub>2</sub> O |

## 2 Experiment parameters of graphene synthesis:

**Table S2.** The experiment parameters of the graphene growth based on activated CO<sub>2</sub> at ambient pressure.

| Carbon source   | Experiment number ( # ) | The flow rate ratio of CO <sub>2</sub> to H <sub>2</sub> (sccm) | Growth temperature (°C) | Growth time (min) |
|-----------------|-------------------------|-----------------------------------------------------------------|-------------------------|-------------------|
| CO <sub>2</sub> | 1                       | 1:200                                                           | 1000                    | 30                |
|                 | 2                       | 3:200                                                           |                         |                   |
|                 | 3                       | 5:200                                                           |                         |                   |
|                 | 4                       | 10:200                                                          |                         |                   |
|                 | 5                       | 15:200                                                          |                         |                   |
|                 | 6                       | 20:200                                                          |                         |                   |
|                 | 7                       | 30:200                                                          |                         |                   |

**Table S3.** The experiment parameters of the graphene growth based on a mixture of CH<sub>4</sub> and H<sub>2</sub> diluted by CO<sub>2</sub> at ambient pressure.

| Carbon source   | Experiment number ( # ) | The flow rate ratio of CH <sub>4</sub> to H <sub>2</sub> to CO <sub>2</sub> (sccm) | Growth temperature (°C) | Growth time (min) |
|-----------------|-------------------------|------------------------------------------------------------------------------------|-------------------------|-------------------|
| CH <sub>4</sub> | 1                       | 5:200:0                                                                            | 1000                    | 30                |
|                 | 2                       | 5:200:2                                                                            |                         |                   |
|                 | 3                       | 5:200:4                                                                            |                         |                   |
|                 | 4                       | 5:200:6                                                                            |                         |                   |
|                 | 5                       | 5:200:8                                                                            |                         |                   |
|                 | 6                       | 5:200:10                                                                           |                         |                   |
|                 | 7                       | 5:200:15                                                                           |                         |                   |
|                 | 8                       | 5:200:20                                                                           |                         |                   |

### 3 Supplementary SEM characterizations

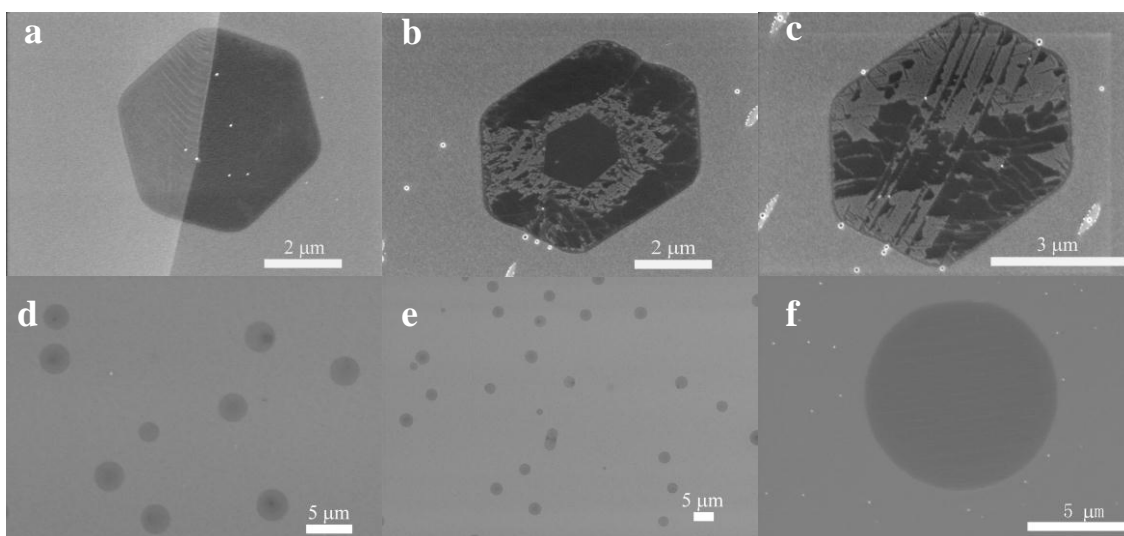

**Figure S1.** (a-c) High-magnified SEM images of graphene domains grown on Cu surfaces using a mixture of 5 sccm CO<sub>2</sub> and 200 sccm H<sub>2</sub>. (d-f) Low and high-magnified SEM images of graphene domains grown on Cu surfaces using a mixture of 20 sccm CO<sub>2</sub> and 200 sccm H<sub>2</sub>.

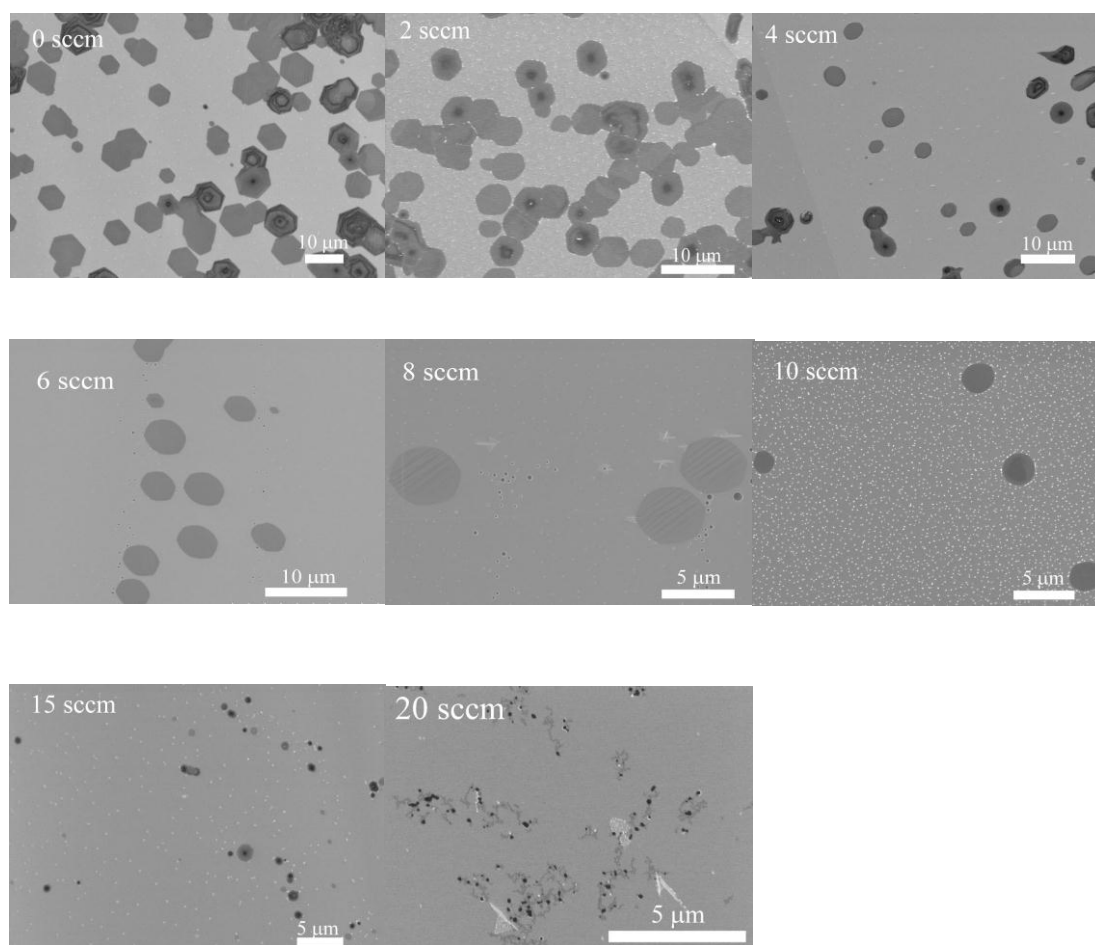

**Figure S2.** SEM images of graphene domains on copper foils using a mixture of 5 sccm CH<sub>4</sub> and 200 sccm H<sub>2</sub> diluted by different flow rates of CO<sub>2</sub> (also see Table S2). The growth time was 30 mins.

#### 4 TEM characterizations of round graphene domain.

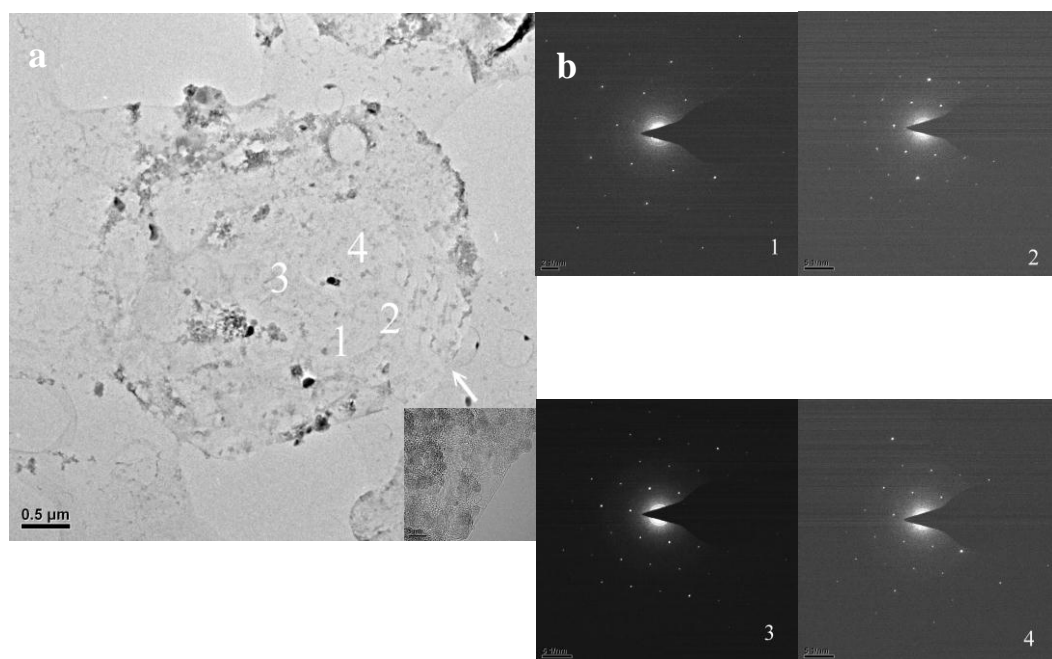

**Figure S3.** TEM characterization of round-shaped graphene. (a) Low-magnification TEM image showing an individual round graphene domain. The inset shows the high resolution TEM image corresponding to the region marked by white arrow in (a) showing single layer. (b) The corresponding SAED on the regions marked by numbers in (a) respectively.

## 5 Details of hexagon graphene devices performance

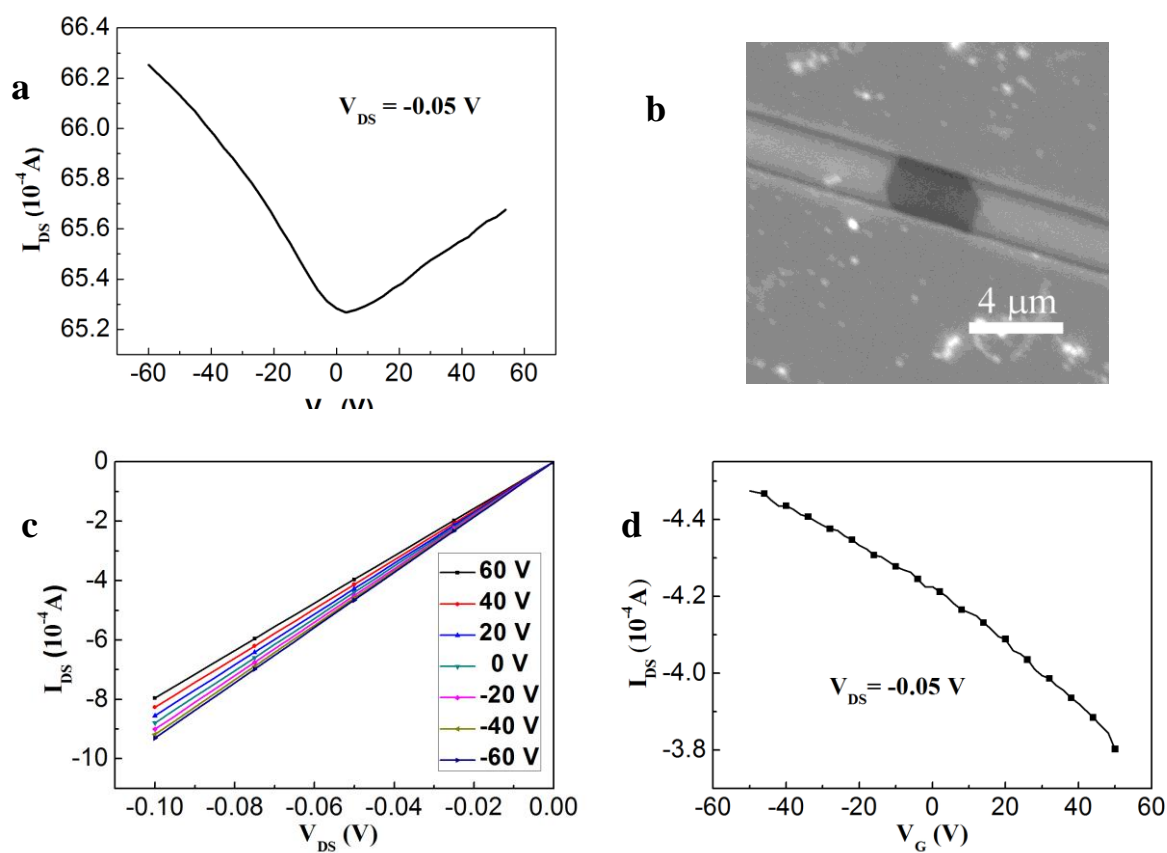

**Figure S4.** Electrical properties of hexagon graphene at room temperature. (a) Transfer characteristics of a device at  $V_{DS} = -0.05$  V in  $N_2$  and the neutral (Dirac) point is at  $\approx 3$  V. (b) A top view SEM image of the hexagon graphene device with a channel length of  $\sim 2.2$   $\mu m$  and channel width of  $\sim 4$   $\mu m$ . (c)  $I_{DS}$ - $V_{DS}$  characteristics for the hexagon graphene device in air at varied  $V_G$ . (d) Transfer characteristics of the hexagon graphene device at  $V_{DS} = -0.05$  V in air.

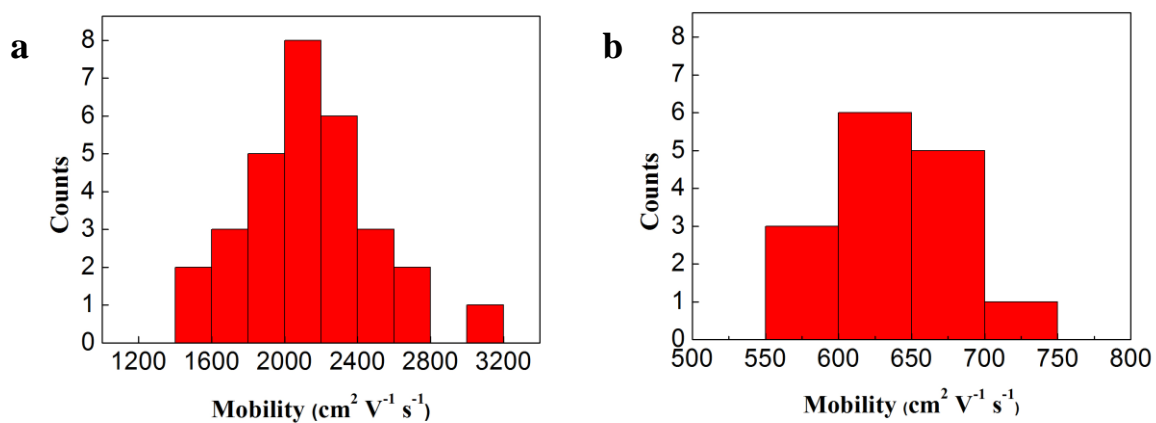

**Figure S5.** Histogram of mobility distribution from 15 CO<sub>2</sub>-derived graphene devices (8 hexagon graphene devices and 7 round graphene devices). (a) Histogram of hole mobility distribution from 15 devices in air and N<sub>2</sub>. (b) Histogram of electron mobility distribution from 15 devices in N<sub>2</sub>.
